# Supplementary material for: Patterns of gender identity data within electronic health record databases can be used as a tool for identifying and estimating the prevalence of gender-expansive people
Source: PubMed Central journal article supplement — JAMIA Open. 2023 Jun 24;6(2):ooad042. doi: 10.1093/jamiaopen/ooad042 (PMC10290553; doi:10.1093/jamiaopen/ooad042), 2023-06-24
Supplement: ooad042_supplementary_data.pdf [file ooad042_supplementary_data.pdf]

## Supplemental

### Gender Identity “Other” or Not Disclosed or Left Blank With Sex Assigned at Birth Provided (n=256)

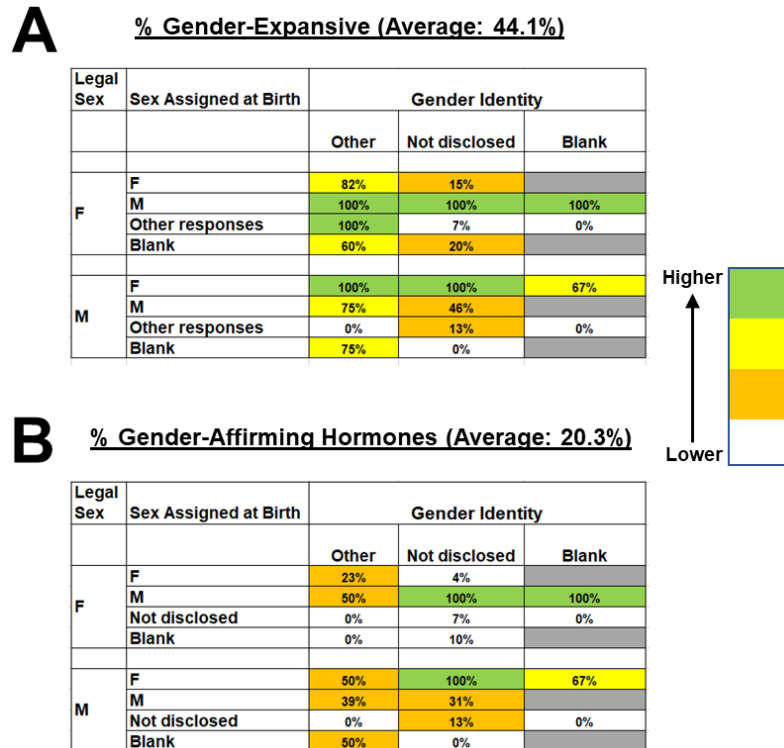

**Figure S1.** Percent of patients who identified as gender-expansive (verified by chart review) and who were taking gender-affirming hormones from those who selected “Other” or “Choose not to disclose” for Gender Identity or left Gender Identity blank while

providing a response for Sex Assigned at Birth (256 unique patients). (A) Percentage of patients in each category that were determined to be gender-expansive by chart review (average of 44.1%). (B) Percentage of patients in each category that were determined to be actively using gender-affirming hormones (average of 20.3%). The color coding indicates frequency of gender-expansive identity or gender-affirming hormones (see index on right side of figure). Abbreviations: Not disclosed, “Choose not to disclose”; Other responses, includes "Not recorded on birth certificate", "Uncertain", or "Unknown" for Sex Assigned at Birth; M, “Male”; F, “Female”; TM, “Transgender male”; TF, “Transgender female”; NB, “Nonbinary”.

## % Gender-Expansive

| Legal Sex | Sex Assigned at Birth | Gender Identity |      |      |      |      |       |               |       |
|-----------|-----------------------|-----------------|------|------|------|------|-------|---------------|-------|
|           |                       | F               | M    | TF   | TM   | NB   | Other | Not disclosed | Blank |
| F         | F                     |                 | 98%  | 100% | 100% | 100% | 82%   | 15%           |       |
|           | M                     | 95%             | 50%  | 100% | 100% | 100% | 100%  | 100%          | 75%   |
|           | Unknown               | 0%              |      |      |      |      |       | 0%            |       |
|           | Not recorded          | 0%              |      |      |      |      |       |               |       |
|           | Uncertain             | 50%             |      |      |      |      |       |               |       |
|           | Not disclosed         | 33%             | 100% | 80%  | 100% | 100% | 100%  | 7%            |       |
|           | Blank                 |                 | 100% | 100% | 100% | 100% | 60%   | 20%           |       |
| M         | F                     | 67%             | 98%  |      | 100% | 100% | 100%  | 100%          | 67%   |
|           | M                     | 100%            |      | 100% | 100% | 99%  | 75%   | 46%           |       |
|           | Unknown               | 100%            | 0%   |      |      |      |       |               | 0%    |
|           | Not recorded          |                 | 0%   |      | 0%   |      |       | 0%            |       |
|           | Uncertain             |                 |      | 100% |      |      |       |               |       |
|           | Not disclosed         | 100%            | 67%  | 100% | 100% | 100% | 0%    | 14%           | 0%    |
|           | Blank                 | 100%            |      | 100% | 100% | 100% | 75%   | 0%            |       |
| U         | F                     | 0%              |      |      |      | 100% |       |               |       |
|           | M                     |                 | 0%   |      |      |      |       |               |       |
|           | Blank                 |                 |      | 100% |      | 100% |       |               | 0%    |

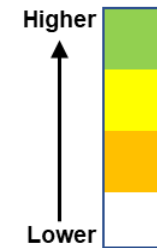

**Figure S2.** Percent gender-expansive for all the gender/sex combinations in the study (123,441 total unique patients). This combines data from Figures 2, 3, and 4 of the main manuscript. "Not recorded" indicates "Not recorded on birth certificate". "Not disclosed" indicates "Choose not to disclose". "Blank" indicates that the patient did not select an option. Abbreviations: M, male; F, female; TM, transgender male; TF, transgender female; NB, nonbinary. The color coding indicates frequency of gender-expansive identity determined from chart review (see index on right side of figure).

# % Gender-Affirming Therapy

| Legal Sex | Sex Assigned at Birth | Gender Identity |      |      |      |      |       |               |       |
|-----------|-----------------------|-----------------|------|------|------|------|-------|---------------|-------|
|           |                       | F               | M    | TF   | TM   | NB   | Other | Not disclosed | Blank |
| F         | F                     |                 | 85%  | 50%  | 88%  | 25%  | 23%   | 4%            |       |
|           | M                     | 93%             | 50%  | 95%  | 100% | 100% | 50%   | 100%          | 100%  |
|           | Unknown               | 0%              |      |      |      |      |       | 0%            |       |
|           | Not recorded          | 0%              |      |      |      |      |       |               |       |
|           | Uncertain             | 50%             |      |      |      |      |       |               |       |
|           | Not disclosed         | 33%             | 100% | 100% | 80%  | 44%  | 0%    | 7%            |       |
|           | Blank                 |                 | 43%  | 60%  | 64%  | 2%   | 0%    | 10%           |       |
| M         | F                     | 67%             | 98%  |      | 99%  | 100% | 50%   | 100%          | 67%   |
|           | M                     | 90%             |      | 91%  | 67%  | 35%  | 39%   | 31%           |       |
|           | Unknown               | 100%            | 0%   |      |      |      |       |               | 0%    |
|           | Not recorded          |                 | 0%   |      | 0%   |      |       | 0%            |       |
|           | Uncertain             |                 |      | 0%   |      |      |       |               |       |
|           | Not disclosed         | 100%            | 67%  | 100% | 100% | 50%  | 0%    | 14%           | 0%    |
|           | Blank                 | 65%             |      | 56%  | 100% | 0%   | 50%   | 0%            |       |
| U         | F                     | 0%              |      |      |      | 67%  |       |               |       |
|           | M                     |                 | 0%   |      |      |      |       |               |       |
|           | Blank                 |                 |      | 100% |      | 0%   |       |               | 0%    |

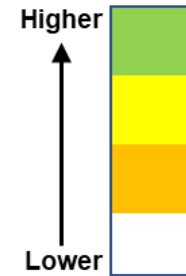

**Figure S3.** Percent gender-affirming therapy for all the gender/sex combinations in the study (123,441 total unique patients). This combines data from Figures 2, 3, and 4 of the main manuscript. "Not recorded" indicates "Not recorded on birth certificate". "Not disclosed" indicates "Choose not to disclose". "Blank" indicates that the patient did not select an option. Abbreviations: M, male; F, female; TM, transgender male; TF, transgender female; NB, nonbinary. The color coding indicates frequency of gender-expansive identity determined from chart review (see index on right side of figure).

| Legal Sex | Sex Assigned at Birth             | Gender Identity                                           |                                                                                        |                                                                                                        |                                                                                              |                                                             |                                                      |                                                      |                                                                                     |
|-----------|-----------------------------------|-----------------------------------------------------------|----------------------------------------------------------------------------------------|--------------------------------------------------------------------------------------------------------|----------------------------------------------------------------------------------------------|-------------------------------------------------------------|------------------------------------------------------|------------------------------------------------------|-------------------------------------------------------------------------------------|
|           |                                   | Female                                                    | Male                                                                                   | Transgender Female / Male-to-Female                                                                    | Transgender Male / Female-to-Male                                                            | Non-binary                                                  | Other                                                | Choose not to disclose                               | Blank                                                                               |
| F         | Female                            | Cisgender female (n=26,000) <sup>1</sup>                  | Transgender male without change in legal sex (n=188) <sup>1</sup>                      | Transgender female with change in legal sex but with error in sex assigned at birth (n=2) <sup>2</sup> | Transgender male without change in legal sex (n=408) <sup>1</sup>                            | Non-binary without change in legal sex (n=389) <sup>1</sup> | Mix of cisgender and gender-expansive (71.9%) (n=57) | Mix of cisgender and gender-expansive (15.2%) (n=46) | Cisgender female (presumed) (n=795) <sup>1</sup>                                    |
|           | Male                              | Transgender female with change in legal sex (n=81)        | Cisgender female and cisgender male, each with error in SOGI fields (n=2) <sup>2</sup> | Transgender female with change in legal sex (n=55)                                                     | Transgender female with change in legal sex but incorrect selection of gender identity (n=1) | Non-binary with change in legal sex (n=4) <sup>2</sup>      | Transgender female with change in legal sex (n=2)    | Transgender female with change in legal sex (n=1)    | Mix of cisgender female and transgender female (75%) with change in legal sex (n=4) |
|           | Unknown                           | Cisgender female (n=1)                                    | Pattern not seen                                                                       | Pattern not seen                                                                                       | Pattern not seen                                                                             | Pattern not seen                                            | Pattern not seen                                     | Cisgender female (n=1)                               | Pattern not seen                                                                    |
|           | Not recorded on birth certificate | Cisgender female (n=1)                                    | Pattern not seen                                                                       | Pattern not seen                                                                                       | Pattern not seen                                                                             | Pattern not seen                                            | Pattern not seen                                     | Pattern not seen                                     | Pattern not seen                                                                    |
|           | Uncertain                         | Cisgender female (50%) and transgender female (50%) (n=2) | Pattern not seen                                                                       | Pattern not seen                                                                                       | Pattern not seen                                                                             | Pattern not seen                                            | Pattern not seen                                     | Pattern not seen                                     | Pattern not seen                                                                    |
|           | Choose not to disclose            | Mix of cisgender and gender-expansive (33.3%) (n=21)      | Transgender male without change in legal sex (n=4)                                     | Transgender female with change in legal sex (n=5)                                                      | Transgender male without change in legal sex (n=5)                                           | Non-binary, one with change in legal sex (n=9)              | Gender-expansive (n=1)                               | Mix of cisgender and gender-expansive (7.1%) (n=28)  | Cisgender female (n=3)                                                              |
|           | Blank                             | Cisgender female (presumed) (n=2,301) <sup>1</sup>        | Transgender male without change in legal sex (n=23)                                    | Transgender female with change in legal sex (n=5)                                                      | Transgender male with or without change in legal sex (n=25)                                  | Non-binary (n=48)                                           | Mix of cisgender and gender-expansive (60%) (n=5)    | Mix of cisgender and gender-expansive (10%) (n=10)   | Cisgender female (presumed) (n=39,799) <sup>1</sup>                                 |

50% or more gender-expansive
  5-49% gender-expansive
  < 5% gender-expansive (including those likely close to 100% cisgender)

**Footnotes (also applies to Supplemental Figure 3B):**

<sup>1</sup> Categories that were randomly sampled for chart review.

<sup>2</sup> Uncommon categories that appear to be due to either selection error or confusion with SOGI terminology

**Figure S4A.** Explanations for the patterns derived from chart review about the gender/sex combinations in the study. This figure includes all combinations in which Legal Sex was "Female" (70,332 unique patients). The color coding indicates 50% or more gender-expansive (green), 5-49% gender-expansive (yellow), and < 5% gender-expansive (orange). The green and yellow categories were 100% chart reviewed. The largest orange categories are predicted as > 95% cisgender.

| Legal Sex | Sex Assigned at Birth             | Gender Identity                                                     |                                                                                                          |                                                                     |                                                                        |                                                                                   |                                                      |                                                      |                                                                                    |
|-----------|-----------------------------------|---------------------------------------------------------------------|----------------------------------------------------------------------------------------------------------|---------------------------------------------------------------------|------------------------------------------------------------------------|-----------------------------------------------------------------------------------|------------------------------------------------------|------------------------------------------------------|------------------------------------------------------------------------------------|
|           |                                   | Female                                                              | Male                                                                                                     | Transgender Female / Male-to-Female                                 | Transgender Male / Female-to-Male                                      | Non-binary                                                                        | Other                                                | Choose not to disclose                               | Blank                                                                              |
| M         | Female                            | Cisgender (33.3%) or transgender (66.7%) (n=3) <sup>2</sup>         | Transgender male with change in legal sex (n=57)                                                         | Pattern not seen                                                    | Transgender male with change in legal sex (n=65)                       | Non-binary (mostly transmasculine) with change in legal sex (n=3)                 | Gender-expansive with change in legal sex (n=2)      | Transgender female with change in legal sex (n=1)    | Cisgender male (33.3%) and transgender male (66.7%) with change in legal sex (n=3) |
|           | Male                              | Transgender female without change in legal sex (n=163) <sup>1</sup> | Cisgender male (presumed) (n=14,198) <sup>1</sup>                                                        | Transgender female without change in legal sex (n=269) <sup>1</sup> | Transgender female or transgender male (n=6) <sup>2</sup>              | Non-binary (mostly transfeminine) without change in legal sex (n=84) <sup>1</sup> | Mix of cisgender and gender-expansive (64.3%) (n=28) | Mix of cisgender and gender-expansive (42.3%) (n=26) | Cisgender male (presumed) (n=500) <sup>1</sup>                                     |
|           | Unknown                           | Transgender female without change in legal sex (n=1)                | Cisgender male, possible confusion related to sex assigned at birth (n=2)                                | Pattern not seen                                                    | Pattern not seen                                                       | Pattern not seen                                                                  | Pattern not seen                                     | Pattern not seen                                     | Cisgender male (n=1)                                                               |
|           | Not recorded on birth certificate | Pattern not seen                                                    | Cisgender male, possible confusion related to sex assigned at birth (n=42)                               | Pattern not seen                                                    | Cisgender male (selected incorrect gender identity) (n=1) <sup>2</sup> | Pattern not seen                                                                  | Pattern not seen                                     | Cisgender male (n=1)                                 | Pattern not seen                                                                   |
|           | Uncertain                         | Pattern not seen                                                    | Pattern not seen                                                                                         | Transgender female without change in legal sex (n=1)                | Pattern not seen                                                       | Pattern not seen                                                                  | Pattern not seen                                     | Pattern not seen                                     | Pattern not seen                                                                   |
|           | Choose not to disclose            | Transgender female without change in legal sex (n=5)                | Mix of cisgender and gender-expansive; majority (62.5%) gender-expansive with change in legal sex (n=24) | Transgender female without change in legal sex (n=3)                | Transgender male with change in legal sex (n=5)                        | Non-binary (transmasculine) with change in legal sex (n=2)                        | Cisgender male (n=1)                                 | Mix of cisgender and gender-expansive (13.6%) (n=22) | Cisgender male (n=4)                                                               |
|           | Blank                             | Transgender female without change in legal sex (n=17)               | Cisgender male (presumed) (n=1,330) <sup>1</sup>                                                         | Transgender female without change in legal sex (n=18)               | Transgender male with change in legal sex (n=3)                        | Non-binary (n=10)                                                                 | Mix of cisgender and gender-expansive (66.7%) (n=4)  | Cisgender male (n=5)                                 | Cisgender male (presumed) (n=36,220) <sup>1</sup>                                  |
| U         | Female                            | Cisgender female (n=1)                                              | Pattern not seen                                                                                         | Pattern not seen                                                    | Pattern not seen                                                       | Non-binary (n=3)                                                                  | Pattern not seen                                     | Pattern not seen                                     | Pattern not seen                                                                   |
|           | Male                              | Pattern not seen                                                    | Cisgender male (n=2)                                                                                     | Pattern not seen                                                    | Pattern not seen                                                       | Pattern not seen                                                                  | Pattern not seen                                     | Pattern not seen                                     | Pattern not seen                                                                   |
|           | Blank                             | Pattern not seen                                                    | Pattern not seen                                                                                         | Transgender female (n=1)                                            | Pattern not seen                                                       | Non-binary (n=1)                                                                  | Pattern not seen                                     | Pattern not seen                                     | Sex unknown (e.g., outreach lab specimen without sex provided) (n=9)               |

**Figure S4B.** This figure includes all combinations in which Legal Sex was "Male" (53,092 unique patients) or "Unknown" (17 unique patients). Four of the possibilities for Sex Assigned at Birth were not seen for any patients with Legal Sex of "Unknown"; thus, those rows are not shown as they are for Legal Sex of "Female" or "Male". The green and yellow categories were 100% chart reviewed. The largest orange categories are predicted as > 95% cisgender.

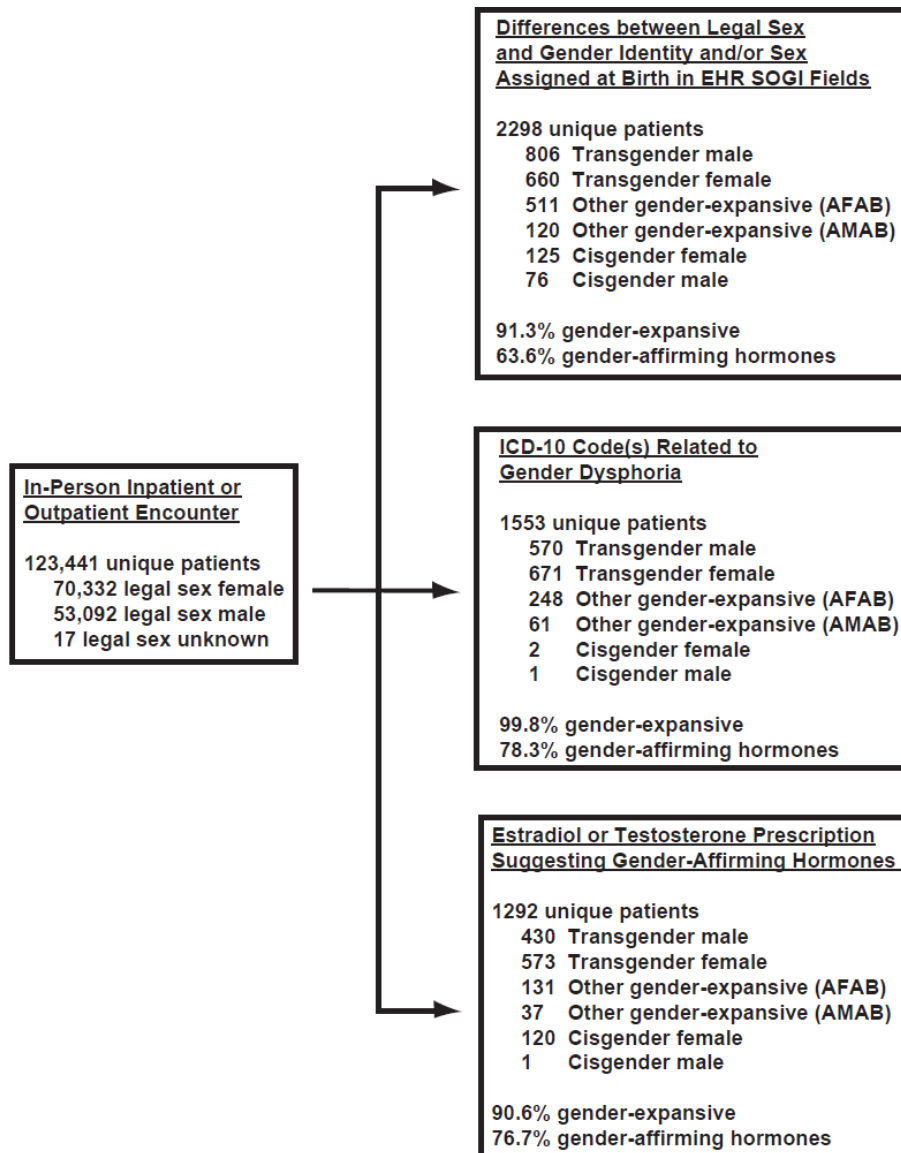

**Figure S5.** Diagram showing breakdown of patients within search categories

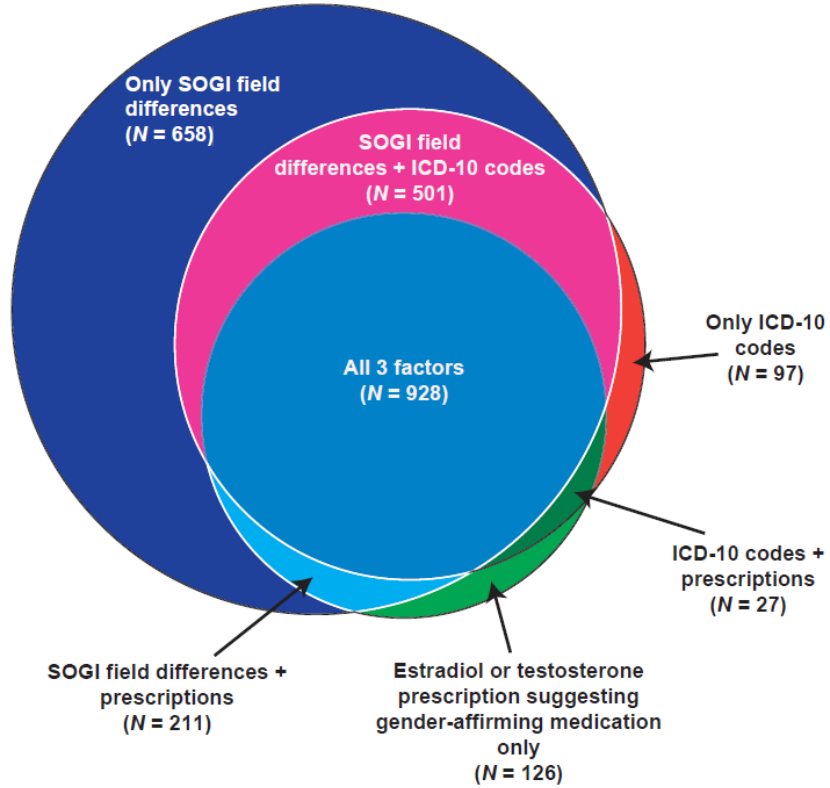

| <b>Factors Present</b>                 | <b>N</b>    | <b>% of Total</b> |
|----------------------------------------|-------------|-------------------|
| Only SOGI field differences            | 658         | 25.8%             |
| Only ICD-10 codes                      | 97          | 3.8%              |
| Only prescriptions                     | 126         | 4.9%              |
| SOGI field differences + ICD-10 codes  | 501         | 19.7%             |
| SOGI field differences + prescriptions | 211         | 8.3%              |
| ICD-10 codes + prescriptions           | 27          | 1.1%              |
| All three factors                      | 928         | 36.4%             |
| <b>Total with 1 or more factor</b>     | <b>2548</b> |                   |

**Figure S6.** Venn diagram of factors studied
